# Supplementary material for: Association of Preterm Birth and Low Birth Weight With Romantic Partnership, Sexual Intercourse, and Parenthood in Adulthood: A Systematic Review and Meta-analysis
Source: PubMed Central journal article supplement (PMC6628597; doi:10.1001/jamanetworkopen.2019.6961), 2019-07-12
Supplement: jamanetwopen-2-e196961-s001.pdf [file jamanetwopen-2-e196961-s001.pdf]

## Supplementary Online Content

Mendonça M, Bilgin A, Wolke D. Association of preterm birth and low birth weight with romantic partnership, sexual intercourse, and parenthood in adulthood: a systematic review and meta-analysis. *JAMA Netw Open*. 2019;2(7):e196961.  
doi:10.1001/jamanetworkopen.2019.6961

**eTable 1.** Newcastle-Ottawa Quality Assessment Scale—Cohort Studies

**eTable 2.** Mean Percentage of Occurrence of Social Transition

This supplementary material has been provided by the authors to give readers additional information about their work.

**eTable 1.** Newcastle-Ottawa Quality Assessment Scale—Cohort Studies

| Selection                                                                                                                                                                                                                                                                                                          |                                                                                                                                                                                                             |                                                                                                                                                          |                                                                                                      | Comparability                                                                                                                                                                                                                                                                                | Outcome                                                                                                                         |                                                                                                                                           |                                                                                                                                                                                                                                                                                                                                                                                |
|--------------------------------------------------------------------------------------------------------------------------------------------------------------------------------------------------------------------------------------------------------------------------------------------------------------------|-------------------------------------------------------------------------------------------------------------------------------------------------------------------------------------------------------------|----------------------------------------------------------------------------------------------------------------------------------------------------------|------------------------------------------------------------------------------------------------------|----------------------------------------------------------------------------------------------------------------------------------------------------------------------------------------------------------------------------------------------------------------------------------------------|---------------------------------------------------------------------------------------------------------------------------------|-------------------------------------------------------------------------------------------------------------------------------------------|--------------------------------------------------------------------------------------------------------------------------------------------------------------------------------------------------------------------------------------------------------------------------------------------------------------------------------------------------------------------------------|
| <u>Representativeness of the exposed cohort</u><br>a) truly representative of the average _____<br>(describe) in the community *<br>b) somewhat representative of the average _____<br>in the community *<br>c) selected group of users eg nurses, volunteers<br>d) no description of the derivation of the cohort | <u>Selection of the non-exposed cohort</u><br>a) drawn from the same community as the exposed cohort *<br>b) drawn from a different source<br>c) no description of the derivation of the non-exposed cohort | <u>Ascertainment of exposure</u><br>a) secure record (eg surgical records) *<br>b) structured interview *<br>c) written self-report<br>d) no description | <u>Demonstration that outcome of interest was not present at start of study</u><br>a) yes *<br>b) no | <u>Comparability of cohorts on the basis of the design or analysis</u><br>a) study controls for _____<br>(select the most important factor) *<br>b) study controls for any additional factor * (This criteria could be modified to indicate specific control for a second important factor.) | <u>Assessment of outcome</u><br>a) independent blind assessment *<br>b) record linkage *<br>c) self-report<br>d) no description | <u>Was follow-up long enough for outcomes to occur</u><br>a) yes (select an adequate follow up period for outcome of interest) *<br>b) no | <u>Adequacy of follow up of cohorts</u><br>a) complete follow up - all subjects accounted for *<br>b) subjects lost to follow up unlikely to introduce bias - small number lost - > ____ % (select an adequate %) follow up, or description provided of those lost) *<br>c) follow up rate < ____ % (select an adequate %) and no description of those lost<br>d) no statement |

**eTable 2.** Mean Percentage of Occurrence of Social Transition

|                       |             | Romantic partnership (%) | Sexual Intercourse (%) | Parenthood* |
|-----------------------|-------------|--------------------------|------------------------|-------------|
| All                   | PT          | 37.3                     | 69.2                   | 20.1        |
|                       | FT          | 54.7                     | 80.9                   | 22.2        |
| Degree of prematurity | EPT         | 25.2                     | 55.8                   | 17.3        |
|                       | VPT         | 37.5                     | 70.8                   | 21.6        |
|                       | MLPT        | 44.1                     | 78.6                   | 20.2        |
|                       |             |                          |                        |             |
| Type of study         | Cohort PT   | 51.6                     | NA                     | 15.2        |
|                       | Cohort FT   | 61.8                     | NA                     | 18.9        |
|                       | Registry PT | 15.1                     | NA                     | 24.8        |
|                       | Registry FT | 28.2                     | NA                     | 35.4        |
|                       |             |                          |                        |             |
| Age Group             | 18-25 PT    | 44.4                     | 66.7                   | 9.4         |
|                       | 18-25 FT    | 53.6                     | 76                     | 10.5        |
|                       | ≥ 26y PT    | 33.1                     | 77.9                   | 24.5        |
|                       | ≥ 26y FT    | 56.1                     | 98.4                   | 32.7        |
|                       |             |                          |                        |             |
| Sex participant       | Male PT     | 41.7                     | 68.9                   | 8           |
|                       | Male FT     | 48.6                     | 81.9                   | 10.6        |
|                       | Female PT   | 51.2                     | 70.8                   | 15          |
|                       | Female FT   | 61.2                     | 84.3                   | 18.9        |

\*Percentages for parenthood exclude data from Drukker et al. because it reports on number of offspring rather than if parent.
